# Supplementary material
Source: publisher site journal article supplement (https://www.spandidos-publications.com/1726/downloadSupplementary)
Supplement: Supplementary file 1 [file downloadSupplementary]

## Sheet: Sheet1
Table SIII. Data for Cox analysis.
Sample ID	futime	fustat	Age, years	Subtype	Sex	Pathological stage	B cell	CD4 T cell	CD8 T cell	Neutrophil	Macrophage	Dendritic	Stromal score	Immune score
TCGA-BL-A0C8	1219	0	73	Non-Papillary	MALE	I-II	0.0995421	0.0820633	0.149766	0.0776688	0.0377778	0.37559	l	l
TCGA-CF-A9FM	398	0	50	Papillary	MALE	I-II	0.0851147	0.150398	0.0801697	0.101281	0.00135757	0.440541	l	l
TCGA-ZF-AA4X	2044	0	56	Non-Papillary	MALE	I-II	0.0895999	0.0978723	0.101784	0.0815961	0.0494724	0.330035	l	l
TCGA-E7-A5KF	20	0	67	Non-Papillary	MALE	I-II	0.108343	0.127307	0.0569583	0.0787885	0	0.344173	l	l
TCGA-GV-A3QH	258	1	67	Non-Papillary	MALE	I-II	0.102558	0.100415	0.0748536	0.0940122	0.032411	0.322548	l	l
TCGA-E7-A5KE	17	0	78	Non-Papillary	FEMALE	I-II	0.0935977	0.0875775	0.0747364	0.0533735	0.0449305	0.324055	l	l
TCGA-G2-A3VY	536	0	66	Non-Papillary	MALE	I-II	0.0861081	0.0790533	0.132985	0.0616158	0.0862397	0.335164	l	l
TCGA-G2-A2EL	819	1	77	Non-Papillary	MALE	I-II	0.0850472	0.135463	0.082998	0.0553096	0	0.305288	l	l
TCGA-G2-AA3B	2008	0	75	Non-Papillary	FEMALE	I-II	0.0981453	0.0953014	0.067928	0.0814603	0	0.308833	l	l
TCGA-GV-A40G	580	0	77	Non-Papillary	MALE	I-II	0.0605878	0.0797012	0.123688	0.0806898	0.0503225	0.286272	l	l
TCGA-LT-A5Z6	474	0	56	Non-Papillary	MALE	I-II	0.0594754	0.11498	0.0983342	0.0603605	0.0910801	0.334077	l	l
TCGA-E7-A6ME	731	0	75	Non-Papillary	MALE	I-II	0.303608	0.0304742	0.182438	0.0605469	0.0200244	0.633667	l	l
TCGA-ZF-A9R4	921	0	83	Non-Papillary	MALE	I-II	0.123082	0.0769919	0.128635	0.0885305	0.00709523	0.381064	l	l
TCGA-YF-AA3M	415	0	57	Non-Papillary	MALE	I-II	0.102772	0.117479	0.163587	0.0996397	0.0567346	0.382985	l	l
TCGA-DK-A3IV	294	1	60	Non-Papillary	MALE	I-II	0.149978	0.264567	0.183811	0.20145	0.00904081	0.56424	l	h
TCGA-GC-A3BM	651	1	70	Non-Papillary	MALE	I-II	0.0885102	0.091011	0.163282	0.0981713	0.0112176	0.378484	l	l
TCGA-GV-A3JW	649	0	74	Non-Papillary	MALE	I-II	0.105266	0.0648706	0.113651	0.054241	0.00318936	0.358484	l	l
TCGA-G2-A3IB	220	1	66	Non-Papillary	MALE	I-II	0.027992	0.112988	0.210361	0.0964257	0	0.505525	l	l
TCGA-E7-A8O8	13	0	59	Non-Papillary	MALE	I-II	0.0443869	0.0670524	0.114928	0.043126	0	0.261083	l	l
TCGA-YF-AA3L	364	0	47	Non-Papillary	FEMALE	I-II	0.0303319	0.0901457	0.0924845	0.0609598	0.0257379	0.283643	l	l
TCGA-G2-A2EJ	1460	0	56	Non-Papillary	FEMALE	I-II	0.000883755	0.125507	0.235769	0.223128	0	0.530918	l	h
TCGA-E7-A4XJ	68	1	66	Non-Papillary	MALE	I-II	0.0426982	0.116668	0.051168	0.0439077	0	0.289962	l	l
TCGA-G2-A3IE	612	1	51	Non-Papillary	MALE	I-II	0.0844742	0.0841681	0.12416	0.0479742	0.0442838	0.324643	l	l
TCGA-K4-A3WV	646	0	77	Non-Papillary	FEMALE	I-II	0.106562	0.235662	0.0623894	0.0957276	0.0253009	0.433018	l	l
TCGA-PQ-A6FI	372	0	70	Non-Papillary	MALE	I-II	0.0709032	0.166356	0.191783	0.112125	0	0.520929	l	h
TCGA-DK-AA6W	415	1	78	Non-Papillary	MALE	I-II	0.104896	0.124769	0.0964586	0.0742917	0.0920975	0.435092	l	l
TCGA-DK-A6AW	1621	0	70	Non-Papillary	MALE	I-II	0.0901556	0.0952737	0.0702119	0.0686593	0	0.34322	l	l
TCGA-FD-A3N6	851	0	43	Non-Papillary	FEMALE	I-II	0.0448627	0.134747	0.141519	0.11455	0	0.411192	l	l
TCGA-E7-A677	820	0	81	Non-Papillary	MALE	I-II	0.0724276	0.112619	0.258204	0.140851	0	0.57866	l	l
TCGA-ZF-A9R7	665	0	76	Non-Papillary	FEMALE	I-II	0.0723357	0.29204	0.194665	0.172195	0.00309829	0.493415	l	h
TCGA-FD-A3N5	685	1	69	Non-Papillary	MALE	I-II	0.0178774	0.193219	0.132178	0.110228	0.00675816	0.544926	l	l
TCGA-XF-A9SH	1971	1	65	Non-Papillary	FEMALE	I-II	0.072754	0.100781	0.10078	0.0763002	0.0219973	0.280833	l	l
TCGA-UY-A78O	2312	0	75	Non-Papillary	FEMALE	I-II	0.050889	0.0677072	0.112978	0.0650645	0	0.325753	l	l
TCGA-XF-AAN2	1869	1	73	Non-Papillary	MALE	I-II	0.0740378	0.162358	0.127767	0.160958	0	0.575956	l	h
TCGA-G2-A2EK	485	0	57	Non-Papillary	MALE	I-II	0.0787652	0.126817	0.155043	0.0889274	0.0413054	0.322627	l	l
TCGA-2F-A9KT	3314	0	83	Non-Papillary	MALE	I-II	0.0626155	0.0730003	0.224184	0.10221	0.0490592	0.437244	l	l
TCGA-K4-A3WV	646	0	77	Non-Papillary	FEMALE	I-II	0.028352	0.117151	0.219761	0.0931314	0.104325	0.337355	l	l
TCGA-ZF-AA4N	88	1	74	Non-Papillary	MALE	I-II	0	0.101599	0.33515	0.138346	0.0840569	0.518479	l	h
TCGA-ZF-A9RF	1949	0	74	Non-Papillary	MALE	I-II	0.156862	0.141542	0.367718	0.129559	0.128598	0.814903	l	h
TCGA-YC-A89H	573	0	78	Non-Papillary	FEMALE	I-II	0.0550649	0.0823357	0.124024	0.081209	0.0605322	0.410652	l	l
TCGA-G2-A2EF	1884	0	50	Non-Papillary	MALE	I-II	0	0.153492	0.304244	0.290659	0.0184597	0.722913	l	h
TCGA-BT-A20W	254	1	71	Non-Papillary	MALE	I-II	0.0888141	0.125486	0.158636	0.0884175	0.00114014	0.386584	l	h
TCGA-GV-A40E	261	1	75	Non-Papillary	MALE	I-II	0.00245955	0.148306	0.158429	0.1437	0	0.595677	l	l
TCGA-K4-A4AC	278	1	83	Non-Papillary	MALE	I-II	0.000622293	0.202099	0.0457086	0.158223	0.0410343	0.511134	l	h
TCGA-GD-A3OS	638	0	54	Non-Papillary	FEMALE	I-II	0.029664	0.277734	0.0489139	0.0809748	0.154326	0.487523	h	l
TCGA-FD-A3NA	1845	0	60	Non-Papillary	MALE	I-II	0.0294872	0.0589415	0.267817	0.144526	0.0785896	0.536766	h	h
TCGA-FD-A43P	832	0	74	Non-Papillary	MALE	I-II	0.095677	0.262015	0.311526	0.156467	0.100334	0.592824	h	h
TCGA-GC-A3RC	484	0	59	Non-Papillary	MALE	I-II	0	0.237336	0.182425	0.134625	0.0677071	0.820932	h	h
TCGA-BT-A20J	579	1	75	Non-Papillary	MALE	I-II	0.296296	0.136453	0.285327	0.266207	0.0338183	1.04776	h	h
TCGA-C4-A0F0	59	0	60	Non-Papillary	MALE	I-II	0.0580591	0.0550143	0.264978	0.106649	0.0574588	0.533635	h	h
TCGA-GC-A6I1	272	1	90	Non-Papillary	FEMALE	I-II	0.0637871	0.114762	0.307644	0.239454	0.0743796	0.73737	h	h
TCGA-FD-A5BR	813	0	57	Non-Papillary	MALE	I-II	0.127383	0.17369	0.121804	0.104505	0.0458861	0.405855	h	h
TCGA-DK-AA6T	572	0	63	Non-Papillary	MALE	I-II	1.38345	0.46205	0	0.211982	0	0.844579	h	h
TCGA-4Z-AA7W	840	0	55	Non-Papillary	MALE	I-II	0.246944	0.077467	0.440084	0.182493	0	0.833374	h	h
TCGA-G2-A2ES	1004	1	85	Non-Papillary	MALE	I-II	0.0570454	0.103151	0.209188	0.17217	0	0.502803	h	h
TCGA-GC-A3OO	481	0	79	Non-Papillary	MALE	I-II	0.0679552	0.120573	0.167369	0.119926	0.0527797	0.545634	h	l
TCGA-DK-AA6M	1582	0	64	Non-Papillary	FEMALE	I-II	0.0714392	0.209237	0.102214	0.135714	0.109029	0.672734	h	h
TCGA-E7-A97P	437	1	73	Non-Papillary	MALE	I-II	0	0.153105	0.351383	0.283144	0	0.634902	h	h
TCGA-FD-A62P	191	1	76	Non-Papillary	MALE	I-II	0.0308481	0.126719	0.191278	0.110498	0.139991	0.594465	h	h
TCGA-UY-A78P	2380	0	78	Non-Papillary	FEMALE	I-II	0.0532129	0.189594	0.0965011	0.209599	0.0243363	0.704047	h	h
TCGA-GU-A766	480	0	62	Non-Papillary	MALE	I-II	0	0.141589	0.349822	0.413354	0	0.786544	h	h
TCGA-UY-A9PH	1561	0	73	Non-Papillary	MALE	I-II	0.100217	0.182908	0.109349	0.186467	0	0.707951	h	h
TCGA-GU-A764	610	0	66	Non-Papillary	MALE	I-II	0.0947975	0.195912	0.202258	0.172491	0.100061	0.567135	h	h
TCGA-G2-A2EC	696	1	58	Non-Papillary	FEMALE	I-II	0.115519	0.174628	0.182278	0.0957089	0.137051	0.385093	h	h
TCGA-DK-A1A5	65	1	79	Non-Papillary	MALE	I-II	0	0.11819	0.262956	0.101912	0.138724	0.53104	h	h
TCGA-GC-A3BM	651	1	70	Non-Papillary	MALE	I-II	0	0	0.400138	0.253288	0	0.478576	h	h
TCGA-FD-A5BU	588	0	76	Non-Papillary	FEMALE	I-II	0.089865	0.235674	0.078319	0.140607	0.0731046	0.671192	h	h
TCGA-UY-A8OD	3432	0	68	Non-Papillary	FEMALE	I-II	0.0466777	0.135982	0.0867942	0.0702027	0.0823337	0.365224	h	h
TCGA-ZF-AA53	1761	0	60	Non-Papillary	MALE	I-II	0	0.131357	0.185909	0.126194	0.149353	0.868564	h	h
TCGA-BT-A20W	254	1	71	Non-Papillary	MALE	I-II	0.051758	0.164383	0.404814	0.185045	0.076756	0.694597	h	h
TCGA-XF-AAME	2828	1	64	Non-Papillary	FEMALE	I-II	0.116623	0.323249	0.247092	0.224119	0.284942	0.665832	h	h
TCGA-FD-A3B8	384	0	56	Non-Papillary	MALE	I-II	0.115837	0.357783	0.266024	0.392401	0.189697	1.03016	h	h
TCGA-ZF-A9R2	642	0	75	Papillary	MALE	I-II	0.100217	0.0735543	0.120486	0.066717	0.0450541	0.316054	l	l
TCGA-ZF-A9RM	1455	0	70	Papillary	MALE	I-II	0.127265	0.102813	0.09274	0.0856978	0.00641688	0.369086	l	l
TCGA-ZF-A9RL	2703	0	61	Papillary	MALE	I-II	0.0685346	0.0687617	0.118618	0.0558139	0.00789175	0.36284	l	l
TCGA-CF-A3MG	369	0	48	Papillary	MALE	I-II	0.112542	0.0699344	0.144743	0.0674492	0.0928016	0.296041	l	l
TCGA-XF-AAML	232	1	75	Papillary	MALE	I-II	0.273096	0.0781864	0.0568428	0.0719729	0	0.488726	l	l
TCGA-E5-A4U1	1181	0	72	Papillary	MALE	I-II	0.0560797	0.0740106	0.119299	0.0549185	0	0.254493	l	l
TCGA-XF-A8HB	1370	0	50	Papillary	FEMALE	I-II	0.0391282	0.0476281	0.186493	0.0745852	0.0436219	0.386516	l	l
TCGA-ZF-A9RE	106	1	78	Papillary	FEMALE	I-II	0.118901	0.0683403	0.159848	0.092096	0.0663445	0.323264	l	l
TCGA-CF-A3MH	398	0	75	Papillary	MALE	I-II	0.0940905	0.108228	0.0908226	0.0681574	0.0106501	0.319429	l	l
TCGA-DK-A3IS	1529	0	68	Papillary	MALE	I-II	0.104825	0.0794616	0.120124	0.070976	0.0108558	0.331361	l	l
TCGA-DK-AA6U	578	0	64	Papillary	MALE	I-II	0.0762342	0.0702626	0.150518	0.0675611	0.0274004	0.363899	l	l
TCGA-DK-A6B0	2330	0	61	Papillary	MALE	I-II	0.0778266	0.129183	0.0548635	0.0672156	0	0.384643	l	l
TCGA-E7-A6MF	750	0	37	Papillary	MALE	I-II	0.0209854	0.0914717	0.238449	0.0928192	0.076659	0.405339	l	l
TCGA-FD-A43X	110	0	84	Papillary	MALE	I-II	0.0524361	0.121692	0.0709149	0.043208	0	0.343807	l	l
TCGA-DK-AA76	366	0	64	Papillary	FEMALE	I-II	0.109272	0.0755839	0.0945952	0.0639436	0	0.279004	l	l
TCGA-4Z-AA80	19	1	73	Papillary	MALE	I-II	0.0951921	0.0489051	0.173329	0.0935598	0.00843427	0.360847	l	l
TCGA-CF-A5U8	399	0	59	Papillary	MALE	I-II	0.0729746	0.118158	0.0738029	0.0592238	0	0.317518	l	l
TCGA-BT-A42C	873	0	64	Papillary	MALE	I-II	0.0898129	0.0727734	0.135376	0.082578	0.0455077	0.330368	l	l
TCGA-CF-A47W	368	0	42	Papillary	MALE	I-II	0.0846866	0.113438	0.0505237	0.05692	0	0.299347	l	l
TCGA-4Z-AA7Y	1522	0	60	Papillary	MALE	I-II	0.0886942	0.0612101	0.211143	0.0883378	0.0924494	0.384474	l	l
TCGA-CF-A47X	384	0	60	Papillary	MALE	I-II	0.101184	0.0722599	0.0821207	0.071109	0	0.27037	l	l
TCGA-CF-A8HY	345	0	59	Papillary	MALE	I-II	0.0568687	0.0694388	0.154751	0.064011	0	0.28928	l	l
TCGA-CF-A5UA	365	0	67	Papillary	MALE	I-II	0.0566269	0.0958087	0.089447	0.0642834	0	0.310693	l	l
TCGA-CF-A47Y	373	0	55	Papillary	MALE	I-II	0.0501122	0.118751	0.0714213	0.0468625	0	0.295837	l	l
TCGA-CF-A8HX	345	0	55	Papillary	FEMALE	I-II	0.0373207	0.102289	0.0562631	0.0473678	0	0.265102	l	l
TCGA-DK-AA6P	457	0	72	Papillary	FEMALE	I-II	0.0915334	0.0788649	0.145757	0.0618433	0	0.31976	l	l
TCGA-CF-A47S	333	0	41	Papillary	MALE	I-II	0.0848598	0.12496	0.0991403	0.0940698	0	0.377944	l	l
TCGA-DK-AA77	618	0	61	Papillary	MALE	I-II	0.149224	0.113286	0.0824497	0.0991969	0	0.43584	l	h
TCGA-LT-A8JT	641	0	69	Papillary	FEMALE	I-II	0.0937955	0.105971	0.121465	0.0786908	0	0.345565	l	l
TCGA-DK-A6B6	1115	0	57	Papillary	MALE	I-II	0.0939798	0.129472	0.151211	0.0902013	0.00217257	0.407028	l	h
TCGA-E7-A4IJ	674	1	56	Papillary	MALE	I-II	0.0481932	0.0867386	0.182067	0.0890781	0	0.374832	l	h
TCGA-GV-A6ZA	691	0	54	Papillary	MALE	I-II	0.0879201	0.113717	0.100588	0.0851491	0	0.344148	l	l
TCGA-KQ-A41R	1350	0	80	Papillary	FEMALE	I-II	0.0465133	0.0689767	0.0653048	0.0607223	0	0.237368	l	l
TCGA-E7-A8O7	466	0	52	Papillary	MALE	I-II	0.159083	0.16593	0.149977	0.144386	0	0.531671	l	h
TCGA-DK-AA71	415	0	71	Papillary	MALE	I-II	0.053821	0.0886357	0.0879645	0.0654758	0.000244767	0.339964	l	l
TCGA-4Z-AA81	1270	1	80	Papillary	MALE	I-II	0.00353479	0.109525	0.260138	0.120221	0	0.551713	l	h
TCGA-CF-A47T	385	1	58	Papillary	FEMALE	I-II	0.0747489	0.10335	0.0927224	0.0464558	0	0.289459	l	l
TCGA-DK-A6B1	2049	0	67	Papillary	MALE	I-II	0.103074	0.0351074	0.186566	0.076953	0.03059	0.384332	l	l
TCGA-E7-A3Y1	163	0	57	Papillary	MALE	I-II	0.0647701	0.108792	0.0680267	0.0484712	0	0.28881	l	l
TCGA-ZF-A9R3	949	1	53	Papillary	FEMALE	I-II	0.100268	0.127193	0.068114	0.114535	0.128077	0.332705	l	l
TCGA-CF-A3MI	370	0	62	Papillary	MALE	I-II	0.0510148	0.0881846	0.0776296	0.0522712	0	0.267732	l	l
TCGA-DK-A6AV	1952	0	82	Papillary	FEMALE	I-II	0.0968409	0.0782526	0.184725	0.0772299	0.0682877	0.362384	l	l
TCGA-E7-A519	508	0	72	Papillary	MALE	I-II	0.13766	0.230749	0	0.0892653	0	0.45884	l	h
TCGA-E7-A541	778	1	66	Papillary	MALE	I-II	0.0799143	0.137571	0.204939	0.125674	0.117746	0.429301	l	h
TCGA-4Z-AA83	2024	0	52	Papillary	MALE	I-II	0.073794	0.143159	0.0650032	0.11489	0	0.415467	l	h
TCGA-CF-A47V	379	0	52	Papillary	MALE	I-II	0.0681727	0.12205	0.130212	0.0878895	0	0.327305	l	h
TCGA-XF-AAMQ	2177	0	59	Papillary	FEMALE	I-II	0.050958	0.166917	0.206274	0.16143	0.0443189	0.461684	l	h
TCGA-4Z-AA7O	512	0	64	Papillary	MALE	I-II	0.0960131	0.1005	0.172659	0.0984418	0	0.390012	l	h
TCGA-E7-A3X6	904	1	70	Papillary	MALE	I-II	0.0208636	0.191704	0.124464	0.188008	0.0155599	0.480442	l	h
TCGA-CF-A9FF	361	0	52	Papillary	MALE	I-II	0.0580808	0.138912	0.13316	0.050771	0	0.311419	l	l
TCGA-DK-AA6X	467	0	63	Papillary	MALE	I-II	0.200645	0.120846	0.164043	0.138219	0.164172	0.490233	l	h
TCGA-CF-A7I0	368	0	54	Papillary	MALE	I-II	0.0468081	0.106466	0.116203	0.065219	0.0195632	0.31124	h	l
TCGA-FD-A3B6	1005	1	75	Papillary	MALE	I-II	0.0777526	0.184592	0.238493	0.174607	0.0919693	0.788154	h	h
TCGA-ZF-AA51	1714	0	69	Papillary	FEMALE	I-II	0.0860744	0.194726	0.108452	0.117282	0.04642	0.419563	h	h
TCGA-K4-A54R	842	0	59	Papillary	MALE	I-II	0	0.0258059	0.371112	0.21697	0	0.547428	h	h
TCGA-K4-A54R	842	0	59	Papillary	MALE	I-II	0	0.134105	0.181625	0.178877	0.0973879	0.508711	h	h
TCGA-BT-A3PK	303	1	80	Papillary	MALE	I-II	0.0796909	0.0726508	0.303645	0.176513	0.0032922	0.579445	h	h
TCGA-K4-A5RJ	539	0	75	Papillary	MALE	I-II	0.0256929	0.17936	0.447681	0.21273	0.320793	1.26855	h	h
TCGA-YC-A8S6	293	0	71	Papillary	MALE	I-II	0.0506092	0.16129	0.218692	0.198402	0.0267436	0.586657	h	h
TCGA-XF-A9SI	2423	0	73	Papillary	FEMALE	I-II	0.288935	0.392557	0.383819	0.307192	0.0805073	0.85826	h	h
TCGA-DK-A2I1	546	0	73	Papillary	FEMALE	I-II	0.0980336	0.0973464	0.104291	0.0857296	0.123032	0.381053	h	h
TCGA-ZF-AA4U	262	1	70	Non-Papillary	MALE	III-IV	0.0804025	0.0955861	0.120544	0.0605774	0	0.334919	l	l
TCGA-E7-A7PW	416	0	63	Non-Papillary	MALE	III-IV	0.0320591	0.111701	0.0920357	0.0458722	0.00175322	0.297287	l	l
TCGA-E7-A678	798	0	55	Non-Papillary	MALE	III-IV	0.0849864	0.113468	0.1171	0.0613345	0	0.347814	l	l
TCGA-DK-AA75	340	1	82	Non-Papillary	MALE	III-IV	0.0335675	0.10359	0.057584	0.0392213	0.0204576	0.263742	l	l
TCGA-GC-A4ZW	15	0	71	Non-Papillary	MALE	III-IV	0.0875337	0.146584	0.157173	0.106666	0.0217555	0.393844	l	l
TCGA-XF-A8HG	467	1	69	Non-Papillary	MALE	III-IV	0.0422937	0.0683447	0.084902	0.0398927	0.0194694	0.248641	l	l
TCGA-UY-A9PA	119	0	48	Non-Papillary	MALE	III-IV	0.0787667	0.161662	0.185639	0.206703	0.0212477	0.519489	l	h
TCGA-BT-A20P	544	1	81	Non-Papillary	FEMALE	III-IV	0.0615003	0.102196	0.0682183	0.0742742	0	0.308804	l	l
TCGA-2F-A9KR	3183	1	59	Non-Papillary	FEMALE	III-IV	0.0989344	0.111038	0.140616	0.0974146	0.0535804	0.339275	l	l
TCGA-BT-A2LA	522	0	54	Non-Papillary	MALE	III-IV	0.0755027	0.120886	0.136966	0.0581781	0.0201727	0.328603	l	l
TCGA-GU-A42Q	344	1	67	Non-Papillary	MALE	III-IV	0.098541	0.112062	0.186884	0.0975198	0.0853006	0.363137	l	l
TCGA-KQ-A41Q	1429	0	89	Non-Papillary	MALE	III-IV	0.0573824	0.057077	0.137151	0.0655304	0.00248656	0.313085	l	l
TCGA-4Z-AA7S	1064	1	66	Non-Papillary	MALE	III-IV	0.111304	0.037912	0.198356	0.0603359	0.0372459	0.326315	l	l
TCGA-GC-A3RB	582	0	54	Non-Papillary	MALE	III-IV	0.0924221	0.113062	0.115371	0.0863844	0.0148813	0.428892	l	l
TCGA-GV-A3JX	581	0	59	Non-Papillary	MALE	III-IV	0.0866976	0.143941	0.180288	0.130446	0.0669962	0.527901	l	h
TCGA-DK-A1AE	491	0	84	Non-Papillary	MALE	III-IV	0.100997	0.0938092	0.17598	0.0713199	0	0.330345	l	l
TCGA-2F-A9KQ	2886	0	69	Non-Papillary	MALE	III-IV	0.0784404	0.0767754	0.145197	0.0745955	0.0435951	0.361551	l	l
TCGA-GC-A3RD	428	0	83	Non-Papillary	FEMALE	III-IV	0.0785745	0.063059	0.139356	0.0771092	0.0437603	0.365812	l	l
TCGA-GU-AATQ	213	1	68	Non-Papillary	MALE	III-IV	0.0723632	0.0934517	0.196932	0.0959607	0.0177352	0.430756	l	l
TCGA-ZF-A9RN	615	1	67	Non-Papillary	FEMALE	III-IV	0.191189	0.0410107	0.270487	0.159845	0	0.636942	l	h
TCGA-FD-A5BV	163	1	47	Non-Papillary	FEMALE	III-IV	0.0941019	0.0885636	0.11233	0.0584516	0.012992	0.337137	l	l
TCGA-BT-A20N	795	1	72	Non-Papillary	MALE	III-IV	0.12093	0.06444	0.212553	0.0585069	0.0651021	0.352811	l	l
TCGA-4Z-AA7M	495	0	65	Non-Papillary	MALE	III-IV	0.0679578	0.109527	0.127994	0.0683247	0.077661	0.294753	l	l
TCGA-CU-A5W6	56	1	70	Non-Papillary	MALE	III-IV	0.0601434	0.0736285	0.118109	0.0947001	0.0621173	0.322627	l	l
TCGA-CU-A3KJ	562	0	75	Non-Papillary	MALE	III-IV	0.0539424	0.199454	0.173944	0.0944248	0	0.550026	l	h
TCGA-E7-A7XN	428	0	66	Non-Papillary	MALE	III-IV	0	0.215647	0.280675	0.3126	0	0.584341	l	h
TCGA-K4-A6FZ	55	0	75	Non-Papillary	FEMALE	III-IV	0.078066	0.117007	0.176647	0.181219	0.0370671	0.580448	l	h
TCGA-CF-A1HR	389	0	62	Non-Papillary	MALE	III-IV	0.0985346	0.0981008	0.155035	0.0761196	0.150785	0.372296	l	l
TCGA-BT-A20U	455	1	70	Non-Papillary	FEMALE	III-IV	0.0473611	0.102752	0.202252	0.070019	0.00481804	0.377352	l	h
TCGA-FJ-A871	272	1	49	Non-Papillary	MALE	III-IV	0	0.0742361	0.28294	0.0540486	0.0220283	0.535707	l	l
TCGA-4Z-AA87	1454	0	72	Non-Papillary	MALE	III-IV	0.0600232	0.101544	0.0778572	0.0675776	0	0.33841	l	h
TCGA-CF-A1HS	382	0	75	Non-Papillary	FEMALE	III-IV	0.111318	0.0835294	0.268517	0.111291	0.0792499	0.613923	l	h
TCGA-K4-A5RI	356	1	67	Non-Papillary	FEMALE	III-IV	0.105895	0.0979898	0.16933	0.100491	0.0555727	0.427385	l	l
TCGA-XF-AAN5	2293	0	61	Non-Papillary	FEMALE	III-IV	0.0293691	0.146593	0.321652	0.225195	0.0604149	0.572076	l	h
TCGA-BT-A0YX	400	1	70	Non-Papillary	FEMALE	III-IV	0.0928556	0.0931015	0.201756	0.128277	0.0582907	0.449318	l	h
TCGA-ZF-A9R0	680	1	82	Non-Papillary	MALE	III-IV	0.0347406	0.128155	0.0533867	0.0623478	0.042588	0.306639	l	l
TCGA-4Z-AA7Q	510	1	79	Non-Papillary	MALE	III-IV	0.118408	0.0973008	0.221905	0.138149	0.0390135	0.550912	l	h
TCGA-PQ-A6FN	507	0	78	Non-Papillary	FEMALE	III-IV	0.0910224	0.165078	0.0942036	0.0646507	0.0202952	0.489236	l	h
TCGA-E7-A85H	394	0	64	Non-Papillary	MALE	III-IV	0.0801209	0.0959946	0.101232	0.0786316	0.0556608	0.352746	l	h
TCGA-DK-A3X1	2009	0	78	Non-Papillary	FEMALE	III-IV	0.0614323	0.0918492	0.111011	0.0612599	0	0.320526	l	l
TCGA-GC-A3I6	630	1	45	Non-Papillary	MALE	III-IV	0.0486661	0.166525	0.22917	0.185443	0.0539685	0.575889	l	h
TCGA-BT-A0S7	200	1	75	Non-Papillary	MALE	III-IV	0.0725766	0.0818712	0.154743	0.0529654	0.0383041	0.352737	h	l
TCGA-BT-A42E	1108	0	74	Non-Papillary	MALE	III-IV	0.0807166	0.238426	0.10905	0.157556	0	0.61507	h	h
TCGA-ZF-AA4V	1806	0	66	Non-Papillary	MALE	III-IV	0.0913823	0.0968691	0.234252	0.0881567	0.0582858	0.526089	h	h
TCGA-HQ-A5NE	370	1	57	Non-Papillary	MALE	III-IV	0.0605903	0.136007	0.250798	0.185217	0.0126677	0.673685	h	h
TCGA-BT-A2LA	522	0	54	Non-Papillary	MALE	III-IV	0	0.0499185	0.278773	0.146219	0	0.420706	h	h
TCGA-C4-A0F1	89	0	71	Non-Papillary	MALE	III-IV	0.0185477	0.0864273	0.229164	0.0962355	0.022005	0.460754	h	l
TCGA-C4-A0F6	700	0	82	Non-Papillary	FEMALE	III-IV	0.0774284	0.0868922	0.147192	0.0575972	0.0791718	0.350722	h	l
TCGA-BT-A20U	455	1	70	Non-Papillary	FEMALE	III-IV	0.109233	0.132674	0.132828	0.126374	0.0441906	0.417167	h	l
TCGA-XF-AAMX	206	1	87	Non-Papillary	FEMALE	III-IV	0.0718146	0.114861	0.0596988	0.0744546	0.103309	0.288678	h	l
TCGA-XF-A8HE	3817	0	47	Non-Papillary	MALE	III-IV	0.0601383	0.111229	0.245765	0.233145	0	0.526042	h	h
TCGA-XF-A8HD	2964	0	77	Non-Papillary	MALE	III-IV	0.141559	0.156405	0.239658	0.178336	0.0502535	0.731473	h	h
TCGA-UY-A9PD	542	0	80	Non-Papillary	MALE	III-IV	0.0671305	0.0820009	0.136102	0.0585932	0.0540693	0.31723	h	l
TCGA-XF-A8HF	2954	1	80	Non-Papillary	MALE	III-IV	0.056155	0.112386	0.0607383	0.061708	0.0304253	0.313471	h	h
TCGA-XF-A9T0	799	0	68	Non-Papillary	MALE	III-IV	0.0918707	0.080984	0.131779	0.0741159	0.0352937	0.388882	h	h
TCGA-ZF-AA56	259	1	79	Non-Papillary	FEMALE	III-IV	0.126388	0.131844	0.19398	0.170402	0.094043	0.505602	h	h
TCGA-XF-AAMG	3364	0	49	Non-Papillary	MALE	III-IV	0.0613824	0.112663	0.139483	0.0920022	0.0439794	0.356604	h	l
TCGA-GC-A3WC	540	0	80	Non-Papillary	FEMALE	III-IV	0.0744994	0.202743	0.189107	0.214631	0.0704273	0.532076	h	h
TCGA-5N-A9KM	530	1	73	Non-Papillary	FEMALE	III-IV	0.1241	0.039296	0.227067	0.138998	0.176238	0.392507	h	h
TCGA-BT-A2LB	492	1	73	Non-Papillary	FEMALE	III-IV	0.0823528	0.100772	0.230116	0.120109	0.0524898	0.38002	h	h
TCGA-CU-A0YN	393	1	60	Non-Papillary	MALE	III-IV	0.0181879	0.171062	0.178574	0.14187	0.012683	0.561614	h	h
TCGA-XF-A9T2	575	1	54	Non-Papillary	MALE	III-IV	0	0	0.52148	0.0562118	0	0.498124	h	l
TCGA-DK-A3IT	648	0	62	Non-Papillary	MALE	III-IV	0.112412	0.118654	0.175931	0.107332	0.159718	0.372356	h	h
TCGA-5N-A9KI	76	1	76	Non-Papillary	FEMALE	III-IV	0.0774684	0.178407	0.235253	0.12483	0.253351	0.463847	h	h
TCGA-FD-A43N	230	0	76	Non-Papillary	MALE	III-IV	0.0429498	0.0801799	0.120988	0.0833195	0.0513487	0.330218	h	l
TCGA-2F-A9KW	254	1	67	Non-Papillary	FEMALE	III-IV	0.0971307	0.115227	0.123777	0.116092	0.129323	0.417981	h	l
TCGA-DK-A1AC	3981	0	72	Non-Papillary	MALE	III-IV	0.0556636	0.0531927	0.307212	0.171028	0.00515583	0.460643	h	h
TCGA-FD-A43Y	474	1	65	Non-Papillary	MALE	III-IV	0.0174551	0.172207	0.165524	0.118422	0.102103	0.551794	h	h
TCGA-ZF-A9RC	2868	0	77	Non-Papillary	MALE	III-IV	0.114152	0.0925408	0.191944	0.0891309	0.118519	0.384789	h	l
TCGA-DK-A3WX	321	1	67	Non-Papillary	FEMALE	III-IV	0	0.190357	0.220138	0.257961	0.0280388	0.614314	h	h
TCGA-K4-A3WU	105	0	87	Non-Papillary	MALE	III-IV	0.227564	0.256679	0.139994	0.133016	0.178746	0.462086	h	h
TCGA-BT-A2LB	492	1	73	Non-Papillary	FEMALE	III-IV	0.0528205	0.132842	0.179525	0.156568	0.17412	0.388376	h	h
TCGA-FD-A3B4	510	1	55	Non-Papillary	FEMALE	III-IV	0.111454	0.254693	0.15042	0.174164	0.04492	0.522704	h	h
TCGA-K4-A4AB	84	0	76	Non-Papillary	MALE	III-IV	0.130912	0.0947765	0.186678	0.156949	0.10368	0.496684	h	h
TCGA-FD-A6TD	386	1	77	Non-Papillary	MALE	III-IV	0.11506	0.104578	0.202275	0.187043	0.0591636	0.734616	h	h
TCGA-FD-A6TC	187	0	79	Non-Papillary	FEMALE	III-IV	0.0122807	0.0882486	0.218123	0.105779	0.395281	0.267414	h	l
TCGA-XF-A9T8	418	1	64	Non-Papillary	MALE	III-IV	0.00668991	0.146325	0.305251	0.220752	0.0894189	0.638275	h	h
TCGA-G2-A2EO	1804	1	69	Non-Papillary	MALE	III-IV	0.0506237	0.127635	0.290461	0.116533	0.0871893	0.462583	h	h
TCGA-K4-AAQO	359	0	56	Non-Papillary	MALE	III-IV	0.0662865	0.129549	0.187117	0.100086	0.0947154	0.435034	h	h
TCGA-FD-A6TB	572	0	82	Non-Papillary	MALE	III-IV	0.278796	0.238698	0.282675	0.186303	0.18238	0.641971	h	h
TCGA-R3-A69X	433	0	70	Non-Papillary	MALE	III-IV	0.15419	0.171021	0.211122	0.182357	0.124987	0.69832	h	h
TCGA-XF-AAMR	2790	0	48	Non-Papillary	MALE	III-IV	0.143369	0.109923	0.225235	0.143657	0.168391	0.561832	h	h
TCGA-XF-A9SM	1048	0	76	Non-Papillary	MALE	III-IV	0.237873	0.14713	0.330063	0.276457	0.227783	0.972946	h	h
TCGA-FD-A5C1	1792	0	61	Non-Papillary	FEMALE	III-IV	0.218904	0.117097	0.135478	0.164965	0	0.826615	h	h
TCGA-UY-A9PB	899	0	49	Non-Papillary	MALE	III-IV	0.0761191	0.277504	0.104246	0.245544	0.049321	0.836532	h	h
TCGA-DK-AA6S	5050	0	60	Non-Papillary	MALE	III-IV	0.0203463	0.226529	0.106257	0.169943	0.0540541	0.530606	h	h
TCGA-GC-A3WC	540	0	80	Non-Papillary	FEMALE	III-IV	0.135447	0.250881	0.248717	0.177727	0.0222322	0.664612	h	h
TCGA-4Z-AA7N	1367	1	65	Non-Papillary	MALE	III-IV	0.667448	0.608531	0.092825	0.234703	0	0.789964	h	h
TCGA-FD-A43S	455	0	71	Non-Papillary	FEMALE	III-IV	0.153698	0.399631	0.078262	0.145322	0.0999272	0.469757	h	h
TCGA-BL-A13I	223	1	57	Non-Papillary	FEMALE	III-IV	0	0.288034	0.0907666	0.230126	0.708587	0.796897	h	h
TCGA-FD-A6TK	330	0	60	Non-Papillary	MALE	III-IV	0.0146219	0.20906	0.351116	0.211092	0.128668	0.92213	h	h
TCGA-ZF-AA54	590	1	71	Non-Papillary	MALE	III-IV	0.104883	0.104581	0.525623	0.227929	0.616024	0.694453	h	h
TCGA-DK-A3WY	4967	0	67	Non-Papillary	FEMALE	III-IV	1.95663	0.744787	0	0.270965	0	1.12495	h	h
TCGA-K4-A5RH	276	0	69	Non-Papillary	MALE	III-IV	0.456538	0.0432105	0.554143	0.219837	0.13847	1.43212	h	h
TCGA-XF-A9SP	454	1	59	Non-Papillary	MALE	III-IV	0.0734534	0.148881	0.125261	0.0888333	0.172235	0.404171	h	h
TCGA-BT-A20O	370	1	75	Non-Papillary	MALE	III-IV	0.430316	0.111308	0.844468	0.365468	0.235546	1.6444	h	h
TCGA-K4-A3WS	761	0	66	Non-Papillary	MALE	III-IV	0.0745979	0.213892	0.161701	0.135064	0.109717	0.497582	h	h
TCGA-XF-AAMJ	1670	1	70	Non-Papillary	MALE	III-IV	0.0460318	0.160045	0.153232	0.114599	0.102754	0.460374	h	h
TCGA-FD-A62S	406	1	60	Non-Papillary	FEMALE	III-IV	0.0929537	0.213927	0.172509	0.197123	0.168884	0.687439	h	h
TCGA-FD-A3B7	122	1	66	Non-Papillary	MALE	III-IV	0.0510024	0.135716	0.493972	0.245898	0.161585	0.868398	h	h
TCGA-BT-A20N	795	1	72	Non-Papillary	MALE	III-IV	0.000795935	0.101161	0.271407	0.199358	0	0.719575	h	h
TCGA-FD-A62N	82	0	69	Non-Papillary	MALE	III-IV	0	0.274731	0.380862	0.311864	0.042384	1.19781	h	h
TCGA-K4-A5RI	356	1	67	Non-Papillary	FEMALE	III-IV	0.0785204	0.302235	0.394511	0.239884	0.169565	0.771553	h	h
TCGA-CU-A0YN	393	1	60	Non-Papillary	MALE	III-IV	0.00623949	0.12923	0.237191	0.131301	0.0075162	0.765306	h	l
TCGA-DK-AA74	1708	0	75	Non-Papillary	MALE	III-IV	0.0533726	0.218975	0.182787	0.205203	0.221596	0.706238	h	h
TCGA-FD-A5BT	328	1	84	Non-Papillary	MALE	III-IV	0	0.191057	0.209756	0.179535	0.13614	0.638211	h	h
TCGA-XF-AAN4	823	1	77	Non-Papillary	FEMALE	III-IV	0.00333031	0.21365	0.255079	0.256971	0.20866	0.751777	h	h
TCGA-FD-A3SP	783	0	60	Non-Papillary	MALE	III-IV	0.0296511	0.22546	0.203099	0.264756	0.210345	0.835595	h	h
TCGA-FD-A5BS	1639	0	68	Non-Papillary	MALE	III-IV	0.418178	0.186713	0.446477	0.268236	0.0637505	0.992419	h	h
TCGA-CF-A27C	425	0	52	Papillary	MALE	III-IV	0.0934172	0.0730781	0.12776	0.0575541	0.0288159	0.305286	l	l
TCGA-GU-A763	997	0	72	Papillary	MALE	III-IV	0.0603383	0.0985998	0.0828791	0.0432707	0	0.307721	l	l
TCGA-S5-AA26	503	0	46	Papillary	MALE	III-IV	0.0471432	0.0922244	0.0785948	0.0516568	0	0.250478	l	l
TCGA-GV-A3QI	1110	0	47	Papillary	MALE	III-IV	0.0989943	0.0743137	0.222135	0.0665305	0.0208336	0.395666	l	l
TCGA-DK-A1AG	475	0	65	Papillary	MALE	III-IV	0.0596702	0.138284	0.119256	0.0849353	0	0.384252	l	l
TCGA-DK-A3IM	248	1	76	Papillary	MALE	III-IV	0.0503968	0.103918	0.17186	0.0644209	0	0.467534	l	l
TCGA-FJ-A3ZF	524	0	73	Papillary	MALE	III-IV	0.0635027	0.0712437	0.0903411	0.0471	0.0411108	0.268018	l	l
TCGA-ZF-A9R5	1090	0	59	Papillary	MALE	III-IV	0.0831335	0.123661	0.112795	0.0752061	0	0.31481	l	l
TCGA-HQ-A2OF	1947	0	52	Papillary	FEMALE	III-IV	0.218494	0.0319895	0.172602	0.0712574	0.0983554	0.322517	l	l
TCGA-E7-A7DU	28	0	73	Papillary	MALE	III-IV	0.0964145	0.121436	0.052357	0.0618691	0	0.334508	l	l
TCGA-XF-A9ST	128	1	68	Papillary	MALE	III-IV	0.121935	0.0557686	0.194733	0.0556352	0.0576861	0.345873	l	l
TCGA-XF-AAN1	941	1	75	Papillary	FEMALE	III-IV	0.0782567	0.111495	0.108239	0.0598776	0	0.366367	l	l
TCGA-DK-A1AA	578	0	57	Papillary	MALE	III-IV	0.0747485	0.111736	0.149142	0.0792992	0.0526552	0.390495	l	l
TCGA-XF-A9T6	64	0	88	Papillary	FEMALE	III-IV	0.0576421	0.0920396	0.202221	0.103136	0.00338787	0.499766	l	l
TCGA-CF-A3MF	383	0	34	Papillary	MALE	III-IV	0.0391987	0.0625408	0.0495778	0.0393609	0	0.187345	l	l
TCGA-MV-A51V	410	0	75	Papillary	MALE	III-IV	0.0037685	0.0817929	0.145473	0.103201	0.0353103	0.328342	l	l
TCGA-KQ-A41N	1604	0	73	Papillary	MALE	III-IV	0.0628316	0.0697441	0.103118	0.0679432	0.0297862	0.249961	l	l
TCGA-GD-A6C6	67	0	64	Papillary	MALE	III-IV	0.0563146	0.0886014	0.0756315	0.0523887	0	0.35598	l	l
TCGA-FT-A3EE	99	1	80	Papillary	FEMALE	III-IV	0.0547192	0.0896079	0.19969	0.0762758	0.0461912	0.475238	l	l
TCGA-CU-A3YL	906	0	67	Papillary	MALE	III-IV	0.110076	0.138944	0.0629051	0.0733509	0.0127471	0.321272	l	l
TCGA-H4-A2HO	46	0	53	Papillary	MALE	III-IV	0.0626667	0.0987807	0.144934	0.0651064	0.0665536	0.289809	l	l
TCGA-BT-A3PJ	789	0	76	Papillary	MALE	III-IV	0.150185	0.132701	0.159393	0.191157	0.0314661	0.718202	l	h
TCGA-DK-A3WW	633	0	57	Papillary	MALE	III-IV	0.0196517	0.0997673	0.38657	0.231765	0	0.652802	l	h
TCGA-CF-A9FL	565	1	85	Papillary	MALE	III-IV	0.0837551	0.10823	0.103412	0.0538167	0.0392192	0.343922	h	l
TCGA-FD-A3SN	887	0	79	Papillary	MALE	III-IV	0.00735671	0.0968159	0.225464	0.120507	0.0438356	0.490809	h	l
TCGA-XF-AAMY	3011	0	78	Papillary	MALE	III-IV	0.0488333	0.113994	0.142241	0.10583	0.123521	0.390904	h	l
TCGA-KQ-A41S	35	0	87	Papillary	FEMALE	III-IV	0.0586248	0.120451	0.17891	0.0878251	0.137097	0.391743	h	l
TCGA-DK-A3IN	250	1	72	Papillary	MALE	III-IV	0.0349042	0.0782819	0.307849	0.183393	0.138512	0.710693	h	h
TCGA-FD-A3B3	974	1	74	Papillary	FEMALE	III-IV	0.041998	0.264499	0.183373	0.309447	0.00221831	0.700735	h	h
TCGA-SY-A9G5	1186	0	66	Papillary	MALE	III-IV	0.00324962	0.180687	0.248892	0.236053	0.0913536	0.56137	h	h
TCGA-ZF-AA52	1077	1	70	Papillary	MALE	III-IV	0.0218178	0.0957823	0.174575	0.144897	0.138006	0.58511	h	h
TCGA-BL-A5ZZ	377	0	80	Papillary	FEMALE	III-IV	0	0.10789	0.322056	0.172292	0.198345	0.581813	h	h
TCGA-DK-A2I4	4343	0	79	Papillary	MALE	III-IV	0	0.297783	0.372441	0.412673	0.226154	1.26515	h	h
TCGA-DK-A3IQ	539	1	74	Papillary	MALE	III-IV	0.034436	0.139523	0.227629	0.125925	0.278271	0.404993	h	l
TCGA-G2-AA3D	2139	0	60	Non-Papillary	MALE	III-IV	0.148912	0.145055	0.0283293	0.0845381	0.0106345	0.45441	l	l
TCGA-CU-A3QU	158	0	58	Non-Papillary	MALE	III-IV	0.105117	0.0511465	0.135929	0.0793901	0.0138348	0.385177	l	l
TCGA-FJ-A3ZE	324	1	65	Non-Papillary	MALE	III-IV	0.0672557	0.0962486	0.106779	0.0496082	0	0.290527	l	l
TCGA-FD-A6TE	376	0	54	Non-Papillary	MALE	III-IV	0.198246	0.0688713	0.101248	0.0555291	0.0118424	0.468623	l	l
TCGA-H4-A2HQ	590	0	64	Non-Papillary	FEMALE	III-IV	0.163731	0.104643	0.182159	0.105902	0.0332669	0.421805	l	l
TCGA-ZF-AA4T	599	1	65	Non-Papillary	MALE	III-IV	0.0843874	0.0785257	0.160004	0.10608	0	0.366547	l	l
TCGA-BT-A20V	154	1	59	Non-Papillary	FEMALE	III-IV	0.102303	0.0940426	0.27205	0.151473	0.0955704	0.457168	l	l
TCGA-2F-A9KP	364	1	66	Non-Papillary	MALE	III-IV	0.0932834	0.0745635	0.128937	0.0737046	0.0161271	0.334085	l	l
TCGA-E5-A2PC	1326	0	61	Non-Papillary	FEMALE	III-IV	0.0471692	0.117625	0.125861	0.117727	0.0153128	0.409705	l	h
TCGA-DK-AA6Q	413	1	61	Non-Papillary	FEMALE	III-IV	0.033896	0.168315	0.225679	0.131564	0.0586077	0.478307	l	h
TCGA-ZF-AA5N	168	1	62	Non-Papillary	FEMALE	III-IV	0.0141792	0.099377	0.117672	0.0609704	0.000140304	0.465432	l	l
TCGA-UY-A8OB	2109	0	63	Non-Papillary	MALE	III-IV	0.256543	0.0690751	0.114538	0.0770433	0	0.725704	l	h
TCGA-GV-A3QK	832	0	56	Non-Papillary	FEMALE	III-IV	0.0724186	0.108198	0.120234	0.0829571	0.00901734	0.348881	l	h
TCGA-C4-A0EZ	273	1	69	Non-Papillary	FEMALE	III-IV	0.0134237	0.200498	0.0425103	0.0451209	0.0337905	0.290205	l	l
TCGA-UY-A78N	2641	1	80	Non-Papillary	MALE	III-IV	0.0742806	0.103278	0.0944482	0.0515523	0.0442724	0.2722	l	l
TCGA-ZF-A9R1	773	0	81	Non-Papillary	MALE	III-IV	0.141045	0.128062	0.175757	0.100121	0.0636543	0.347833	l	l
TCGA-DK-A1A7	560	0	67	Non-Papillary	FEMALE	III-IV	0.0683685	0.0631792	0.104936	0.0523398	0	0.231103	l	l
TCGA-G2-AA3F	893	0	77	Non-Papillary	MALE	III-IV	0.11521	0.0984966	0.0614621	0.0550256	0.0286095	0.335868	l	l
TCGA-BT-A3PH	142	1	76	Non-Papillary	MALE	III-IV	0.0405178	0.0873967	0.11334	0.0625482	0.0592931	0.429642	l	l
TCGA-DK-A2I6	2656	0	81	Non-Papillary	MALE	III-IV	0.0734197	0.0839717	0.150477	0.0756406	0	0.420075	l	l
TCGA-DK-AA6L	1163	1	48	Non-Papillary	MALE	III-IV	0.0792469	0.148625	0.154086	0.128996	0.0914305	0.540407	l	h
TCGA-FD-A3SS	391	1	66	Non-Papillary	MALE	III-IV	0.0852656	0.0880743	0.118988	0.0725557	0.123826	0.329649	l	l
TCGA-DK-AA6R	5041	0	68	Non-Papillary	MALE	III-IV	0	0.167311	0.237042	0.115838	0	0.596144	l	l
TCGA-C4-A0F7	62	1	77	Non-Papillary	MALE	III-IV	0.0874535	0.103556	0.164954	0.0554833	0.0423278	0.378637	l	l
TCGA-DK-A6B5	1542	0	45	Non-Papillary	MALE	III-IV	0.0375898	0.178652	0.146055	0.143769	0.0471437	0.569019	l	h
TCGA-XF-AAMH	344	1	80	Non-Papillary	MALE	III-IV	0.000254719	0.0857035	0.190992	0.0460391	0	0.398644	l	l
TCGA-FD-A62O	216	1	74	Non-Papillary	MALE	III-IV	0.0540736	0.0470916	0.169678	0.0755758	0.0527252	0.293637	l	l
TCGA-FD-A3B5	272	1	86	Non-Papillary	MALE	III-IV	0.0595261	0.090003	0.188498	0.0839283	0.0264387	0.460332	l	l
TCGA-FD-A6TI	294	1	73	Non-Papillary	MALE	III-IV	0.0628234	0.0198252	0.240514	0.111654	0.174524	0.325287	l	l
TCGA-DK-A3IL	413	1	79	Non-Papillary	FEMALE	III-IV	0.0438077	0.113823	0.103078	0.0642571	0.0874405	0.309792	l	l
TCGA-XF-A9T4	495	1	48	Non-Papillary	MALE	III-IV	0.0157148	0.190775	0.32499	0.1697	0.0824263	0.670027	l	h
TCGA-BT-A2LD	623	1	78	Non-Papillary	FEMALE	III-IV	0.106444	0.105725	0.138545	0.0971915	0.0993271	0.372348	l	l
TCGA-DK-A1A6	2020	0	53	Non-Papillary	MALE	III-IV	0.00953866	0.0862898	0.207705	0.162257	0.0223982	0.423464	l	h
TCGA-UY-A9PE	189	0	86	Non-Papillary	MALE	III-IV	0.0663178	0.0759903	0.109473	0.0652653	0.00116398	0.323352	l	l
TCGA-FD-A5C0	550	1	61	Non-Papillary	MALE	III-IV	0.0444533	0.0596984	0.235476	0.108859	0.213602	0.327824	h	l
TCGA-XF-AAMW	253	1	79	Non-Papillary	FEMALE	III-IV	0.015467	0.139647	0.395199	0.173096	0.129361	0.66223	h	h
TCGA-XF-AAN0	1718	1	68	Non-Papillary	MALE	III-IV	0.0637913	0.141769	0.16629	0.118458	0.0684016	0.492701	h	h
TCGA-CU-A0YO	149	1	84	Non-Papillary	MALE	III-IV	0.0787044	0.132214	0.189378	0.135893	0.0635777	0.420566	h	h
TCGA-K4-A6MB	469	0	64	Non-Papillary	MALE	III-IV	0.0969128	0.0985674	0.146905	0.0845205	0.0674693	0.384609	h	l
TCGA-GV-A3JZ	603	0	55	Non-Papillary	MALE	III-IV	0.117492	0.104729	0.103417	0.0892821	0.0401131	0.396019	h	l
TCGA-DK-A1AD	3420	0	69	Non-Papillary	MALE	III-IV	0.0423098	0.0647528	0.135402	0.0559278	0.0908906	0.283151	h	l
TCGA-ZF-A9RD	408	1	75	Non-Papillary	FEMALE	III-IV	0.094968	0.149619	0.374634	0.168839	0	0.74954	h	h
TCGA-BT-A20X	251	1	56	Non-Papillary	MALE	III-IV	0.0767696	0.0902111	0.237481	0.0951032	0.0339665	0.4809	h	h
TCGA-UY-A78M	690	1	81	Non-Papillary	FEMALE	III-IV	0.085665	0.113596	0.0598848	0.0532131	0.0172956	0.382354	h	l
TCGA-GC-A6I3	423	0	90	Non-Papillary	FEMALE	III-IV	0.140244	0.182027	0.0575465	0.0717259	0	0.535987	h	h
TCGA-BT-A42F	864	0	64	Non-Papillary	MALE	III-IV	0.029008	0.0936097	0.2172	0.156492	0	0.606836	h	h
TCGA-FD-A3SJ	739	1	59	Non-Papillary	MALE	III-IV	0.0809673	0.132209	0.122388	0.0723994	0.0239219	0.391875	h	l
TCGA-ZF-AA5H	897	0	60	Non-Papillary	FEMALE	III-IV	0	0.259564	0.212051	0.161463	0.0521739	0.80899	h	h
TCGA-4Z-AA82	1556	1	59	Non-Papillary	MALE	III-IV	0.0154865	0.140739	0.366005	0.147366	0.0427953	0.723066	h	l
TCGA-CU-A72E	413	1	76	Non-Papillary	MALE	III-IV	0.0417455	0.104044	0.118107	0.0767652	0.0895707	0.369417	h	l
TCGA-2F-A9KO	734	1	63	Non-Papillary	MALE	III-IV	0.141574	0.151346	0.213906	0.155901	0.0345277	0.517588	h	h
TCGA-GV-A3JV	434	1	66	Non-Papillary	MALE	III-IV	0.066398	0.0837974	0.228804	0.106895	0.0318004	0.375078	h	h
TCGA-XF-AAN7	565	1	60	Non-Papillary	MALE	III-IV	0.0813284	0.169406	0.304162	0.125311	0.234302	0.239069	h	l
TCGA-KQ-A41P	1094	0	76	Non-Papillary	MALE	III-IV	0.0467077	0.127064	0.0769589	0.0704238	0.0514836	0.393185	h	h
TCGA-E7-A97Q	246	1	60	Non-Papillary	FEMALE	III-IV	0.0652565	0.135719	0.0739273	0.0822947	0.146783	0.276239	h	l
TCGA-BT-A20T	453	1	63	Non-Papillary	MALE	III-IV	0.0860505	0.114344	0.141356	0.0934037	0.0792372	0.408228	h	h
TCGA-XF-A9T5	2027	0	78	Non-Papillary	FEMALE	III-IV	0.576195	0	0.204018	0.128076	0	0.991258	h	h
TCGA-FD-A6TH	131	1	63	Non-Papillary	MALE	III-IV	0.0748596	0.0874686	0.143569	0.0944277	0.221168	0.509782	h	l
TCGA-E7-A6MD	129	0	66	Non-Papillary	MALE	III-IV	0.147708	0.233044	0.10397	0.104643	0.0611807	0.436922	h	h
TCGA-G2-AA3C	211	1	66	Non-Papillary	MALE	III-IV	0	0.24127	0.122127	0.165376	0.428759	0.663058	h	h
TCGA-CU-A0YR	460	1	83	Non-Papillary	MALE	III-IV	0.0999874	0.0160237	0.212739	0.142704	0.104554	0.523735	h	h
TCGA-FJ-A3Z7	945	0	76	Non-Papillary	MALE	III-IV	0.0154172	0.0618039	0.24101	0.10278	0	0.277251	h	l
TCGA-ZF-AA4R	1036	1	67	Non-Papillary	MALE	III-IV	0.0610093	0.14154	0.160027	0.0899643	0.133203	0.426484	h	l
TCGA-XF-A9SJ	98	1	83	Non-Papillary	MALE	III-IV	0.0661559	0.103028	0.231408	0.0860347	0.182082	0.608841	h	h
TCGA-DK-A2I2	237	1	63	Non-Papillary	FEMALE	III-IV	0	0.200199	0.309946	0.185125	0	0.91898	h	h
TCGA-XF-A8HH	57	1	61	Non-Papillary	FEMALE	III-IV	0.0754279	0.119698	0.0936757	0.0818529	0.0738882	0.32266	h	l
TCGA-XF-AAN3	2625	0	76	Non-Papillary	MALE	III-IV	0.121494	0.137586	0.164142	0.126431	0.0915499	0.467905	h	h
TCGA-UY-A8OC	92	1	90	Non-Papillary	MALE	III-IV	0.0206678	0.124362	0.245776	0.106076	0.018721	0.54441	h	l
TCGA-S5-A6DX	56	1	83	Non-Papillary	MALE	III-IV	0.0467306	0.15275	0.115226	0.09508	0.0946149	0.420002	h	h
TCGA-BT-A20Q	593	1	73	Non-Papillary	MALE	III-IV	0.115177	0.13851	0.175794	0.142161	0.0676706	0.475979	h	h
TCGA-FD-A3SR	602	1	68	Non-Papillary	MALE	III-IV	0.0556085	0.200185	0.121892	0.175282	0.283423	0.447536	h	h
TCGA-FD-A3SO	168	1	68	Non-Papillary	MALE	III-IV	0.0231378	0.151989	0.221839	0.176005	0.00945519	0.68319	h	h
TCGA-GU-A762	232	1	87	Non-Papillary	MALE	III-IV	0.154564	0.215637	0.311676	0.201708	0.0211846	0.922131	h	h
TCGA-FD-A6TF	69	1	80	Non-Papillary	FEMALE	III-IV	0.0562086	0.118095	0.192974	0.11656	0.131376	0.48513	h	l
TCGA-GC-A3YS	758	0	61	Non-Papillary	MALE	III-IV	0.0178318	0.141539	0.244351	0.133179	0.196127	0.466686	h	h
TCGA-FD-A6TG	93	1	73	Non-Papillary	MALE	III-IV	0.136889	0.100314	0.160138	0.085062	0.191072	0.488432	h	h
TCGA-XF-A9T3	68	0	69	Non-Papillary	FEMALE	III-IV	0.0795639	0.238631	0.12751	0.128366	0.0460061	0.661375	h	h
TCGA-XF-A9SY	640	0	60	Non-Papillary	FEMALE	III-IV	0	0.283437	0.455253	0.352908	0	1.03315	h	h
TCGA-GC-A6I3	423	0	90	Non-Papillary	FEMALE	III-IV	0.317213	0.589171	0	0.19226	0.0355488	0.576896	h	h
TCGA-4Z-AA86	311	1	66	Non-Papillary	MALE	III-IV	0.0127917	0.179692	0.281281	0.306014	0.105224	0.856107	h	h
TCGA-DK-A6B2	477	0	70	Non-Papillary	MALE	III-IV	0.180329	0.165454	0.124467	0.131316	0.229267	0.499822	h	h
TCGA-XF-A9SZ	859	1	79	Non-Papillary	MALE	III-IV	0.129118	0.0993405	0.206525	0.125605	0.157175	0.522411	h	h
TCGA-ZF-AA5P	372	0	65	Non-Papillary	MALE	III-IV	0.103388	0.168102	0.181827	0.154518	0.0426631	0.485467	h	h
TCGA-XF-A9SK	486	1	65	Non-Papillary	MALE	III-IV	0.157116	0.149967	0.0971772	0.137026	0.1709	0.551499	h	h
TCGA-ZF-A9R9	864	1	58	Non-Papillary	MALE	III-IV	0.0458805	0.151291	0.0809345	0.0677302	0.0758874	0.297949	h	h
TCGA-FD-A5BX	173	1	82	Non-Papillary	MALE	III-IV	0.0259584	0.22333	0.182703	0.155475	0.160429	0.675077	h	h
TCGA-ZF-AA58	1649	0	61	Non-Papillary	FEMALE	III-IV	0	0.203526	0.334498	0.396036	0.0937763	0.994977	h	h
TCGA-FD-A3SQ	1423	1	62	Non-Papillary	MALE	III-IV	0.118843	0.141456	0.158669	0.157943	0.20177	0.463292	h	h
TCGA-XF-AAMT	90	1	75	Non-Papillary	FEMALE	III-IV	0.0687278	0.169791	0.168189	0.156872	0.206361	0.475358	h	h
TCGA-BT-A20R	154	1	79	Non-Papillary	FEMALE	III-IV	0.0289523	0.100545	0.20843	0.120926	0.362248	0.413788	h	h
TCGA-DK-A1AB	508	1	74	Non-Papillary	FEMALE	III-IV	0.0841508	0.169954	0.14352	0.191441	0.0662967	0.610571	h	h
TCGA-BT-A20Q	593	1	73	Non-Papillary	MALE	III-IV	0.0135187	0.0977804	0.267317	0.134003	0	0.732148	h	l
TCGA-XF-A9SX	719	1	63	Non-Papillary	FEMALE	III-IV	0.144508	0.149596	0.145896	0.122792	0.0903358	0.939196	h	h
TCGA-DK-A2HX	1420	1	80	Non-Papillary	FEMALE	III-IV	0.0259145	0.106748	0.217525	0.117047	0.152258	0.529455	h	l
TCGA-FD-A43U	636	0	70	Non-Papillary	MALE	III-IV	0	0.27127	0.0895968	0.145978	0.127477	0.689746	h	h
TCGA-FD-A5BZ	835	1	77	Non-Papillary	FEMALE	III-IV	0.0424568	0.117047	0.186423	0.12124	0.182768	0.338195	h	l
TCGA-K4-A83P	495	0	77	Non-Papillary	MALE	III-IV	0.493142	0.3616	0.178075	0.211563	0.166896	0.67783	h	h
TCGA-FD-A3SL	712	1	60	Non-Papillary	MALE	III-IV	0.010934	0.134732	0.248078	0.12402	0.167878	0.481088	h	h
TCGA-XF-A9SL	2020	1	69	Non-Papillary	MALE	III-IV	0.170934	0.339607	0.0922577	0.140998	0.169873	0.533728	h	h
TCGA-DK-A1AF	536	0	84	Non-Papillary	FEMALE	III-IV	0.0760028	0.172912	0.377102	0.220385	0.245247	0.614733	h	h
TCGA-CU-A0YR	460	1	83	Non-Papillary	MALE	III-IV	0.0803312	0.154237	0.325211	0.158775	0.000297953	0.727918	h	h
TCGA-BT-A20R	154	1	79	Non-Papillary	FEMALE	III-IV	0	0.0464879	0.301277	0.231516	0	0.674415	h	h
TCGA-XF-A9SW	362	1	85	Non-Papillary	MALE	III-IV	0.054526	0.16901	0.256223	0.140298	0.284025	0.412364	h	h
TCGA-KQ-A41O	1538	0	84	Papillary	MALE	III-IV	0.0492423	0.048717	0.0908163	0.0424143	0	0.218291	l	l
TCGA-4Z-AA89	902	0	60	Papillary	MALE	III-IV	0.0783774	0.113794	0.0878799	0.0704921	0	0.33036	l	l
TCGA-XF-A8HC	200	1	79	Papillary	MALE	III-IV	0.0392189	0.0716043	0.104073	0.0565634	0.0266436	0.273223	l	l
TCGA-E5-A4TZ	467	1	64	Papillary	MALE	III-IV	0.0704255	0.115873	0.191225	0.0668287	0.0480848	0.442155	l	l
TCGA-GU-A42P	332	1	72	Papillary	MALE	III-IV	0.0912665	0.106201	0.0881812	0.0629841	0.0694857	0.28953	l	l
TCGA-DK-A3X2	547	1	85	Papillary	MALE	III-IV	0.0505786	0.119953	0.0890792	0.0728701	0.018795	0.32518	l	l
TCGA-GV-A3QF	617	1	79	Papillary	MALE	III-IV	0.106387	0.095464	0.0747987	0.0790213	0.00190967	0.34703	l	l
TCGA-GU-A42R	577	1	68	Papillary	MALE	III-IV	0.0970439	0.0648596	0.159404	0.0870238	0.0133275	0.341464	l	l
TCGA-XF-A8HI	544	1	57	Papillary	FEMALE	III-IV	0.0857664	0.127942	0.121154	0.0898438	0	0.393688	l	l
TCGA-GD-A3OQ	95	0	48	Papillary	MALE	III-IV	0.0537878	0.099783	0.313398	0.120218	0.0226882	0.599313	l	l
TCGA-XF-AAMZ	1348	1	81	Papillary	FEMALE	III-IV	0.113572	0.11061	0.124042	0.0757148	0.0364	0.338836	l	l
TCGA-4Z-AA84	460	0	61	Papillary	MALE	III-IV	0.0111374	0.146887	0.186672	0.056137	0.0292351	0.467001	l	l
TCGA-4Z-AA7R	522	1	73	Papillary	MALE	III-IV	0.105191	0.0880551	0.136086	0.0753625	0.0341211	0.400089	l	l
TCGA-YC-A9TC	20	1	71	Papillary	MALE	III-IV	0.0508013	0.0410133	0.124824	0.0962479	0	0.366725	l	l
TCGA-UY-A78K	536	1	60	Papillary	MALE	III-IV	0.229734	0.267192	0.201484	0.10336	0.114646	0.56916	l	h
TCGA-UY-A9PF	117	0	77	Papillary	MALE	III-IV	0.0964879	0.0718547	0.147899	0.0932988	0	0.388298	h	h
TCGA-DK-A3IK	146	1	87	Papillary	MALE	III-IV	0.058798	0.102969	0.0778442	0.0610418	0.0103251	0.292166	h	l
TCGA-GU-A767	144	1	81	Papillary	MALE	III-IV	0.068771	0.0938563	0.108403	0.0716537	0	0.317057	h	l
TCGA-LC-A66R	466	0	78	Papillary	MALE	III-IV	0.0918932	0.0648398	0.386832	0.242663	0.0320133	0.641822	h	h
TCGA-UY-A78L	1127	0	62	Papillary	MALE	III-IV	0.0597467	0.249607	0.0733464	0.0714432	0.0139685	0.568328	h	l
TCGA-GD-A2C5	812	0	53	Papillary	FEMALE	III-IV	0.196437	0.199512	0.27175	0.142922	0.118069	0.484643	h	h
TCGA-GD-A2C5	812	0	53	Papillary	FEMALE	III-IV	0.0688795	0.0865381	0.137585	0.0894127	0.081422	0.343469	h	l
TCGA-GU-AATO	324	1	75	Papillary	MALE	III-IV	0.0823512	0.0913475	0.206672	0.130705	0.192424	0.36312	h	h
TCGA-BL-A13J	81	1	65	Papillary	MALE	III-IV	0.0600263	0.113178	0.135916	0.0694981	0.0687719	0.367608	h	l
TCGA-GD-A3OP	64	0	84	Papillary	FEMALE	III-IV	0.0420632	0.11621	0.219564	0.166165	0.0489089	0.493095	h	h
TCGA-GD-A3OP	64	0	84	Papillary	FEMALE	III-IV	0.0770965	0.11009	0.172467	0.106416	0.11623	0.369474	h	l
TCGA-FD-A3SM	547	1	70	Papillary	MALE	III-IV	0.0731995	0.096309	0.150002	0.0839353	0.149205	0.415605	h	l
TCGA-XF-A9SV	388	1	82	Papillary	MALE	III-IV	0.054718	0.03806	0.188288	0.0847119	0.0940524	0.334682	h	l
TCGA-XF-A9SU	182	1	74	Papillary	FEMALE	III-IV	0.0791639	0.115877	0.128751	0.0848814	0.133025	0.370213	h	h
TCGA-FD-A6TA	1912	0	58	Papillary	MALE	III-IV	0.143766	0.160605	0.133245	0.142923	0.131948	0.432999	h	h
TCGA-GD-A3OQ	95	0	48	Papillary	MALE	III-IV	0.016538	0.120169	0.279547	0.136096	0.0701646	0.540205	h	h
TCGA-GU-AATP	1003	0	74	Papillary	MALE	III-IV	0.14855	0.123957	0.0995474	0.12041	0.0712639	0.461444	h	h
TCGA-E7-A7DV	37	0	44	Papillary	MALE	III-IV	0	0.169032	0.262049	0.152156	0.399183	1.09022	h	h
TCGA-FT-A61P	337	0	76	Papillary	MALE	III-IV	0.0215115	0.245384	0.043627	0.164576	0.0570941	0.653989	h	h
TCGA-SY-A9G0	1008	1	82	Papillary	MALE	III-IV	0.124801	0.17859	0.168619	0.108595	0.0723504	0.473414	h	h
TCGA-BL-A13J	81	1	65	Papillary	MALE	III-IV	0.0105919	0.11463	0.306591	0.193668	0.0773451	0.641207	h	l
